# Supplementary material for: Comparative genomics and phylogenetic relationships of two endemic and endangered species (Handeliodendron bodinieri and Eurycorymbus cavaleriei) of two monotypic genera within Sapindales
Source: PubMed Central journal article supplement (PMC8734052; doi:10.1186/s12864-021-08259-w), 2022-01-06

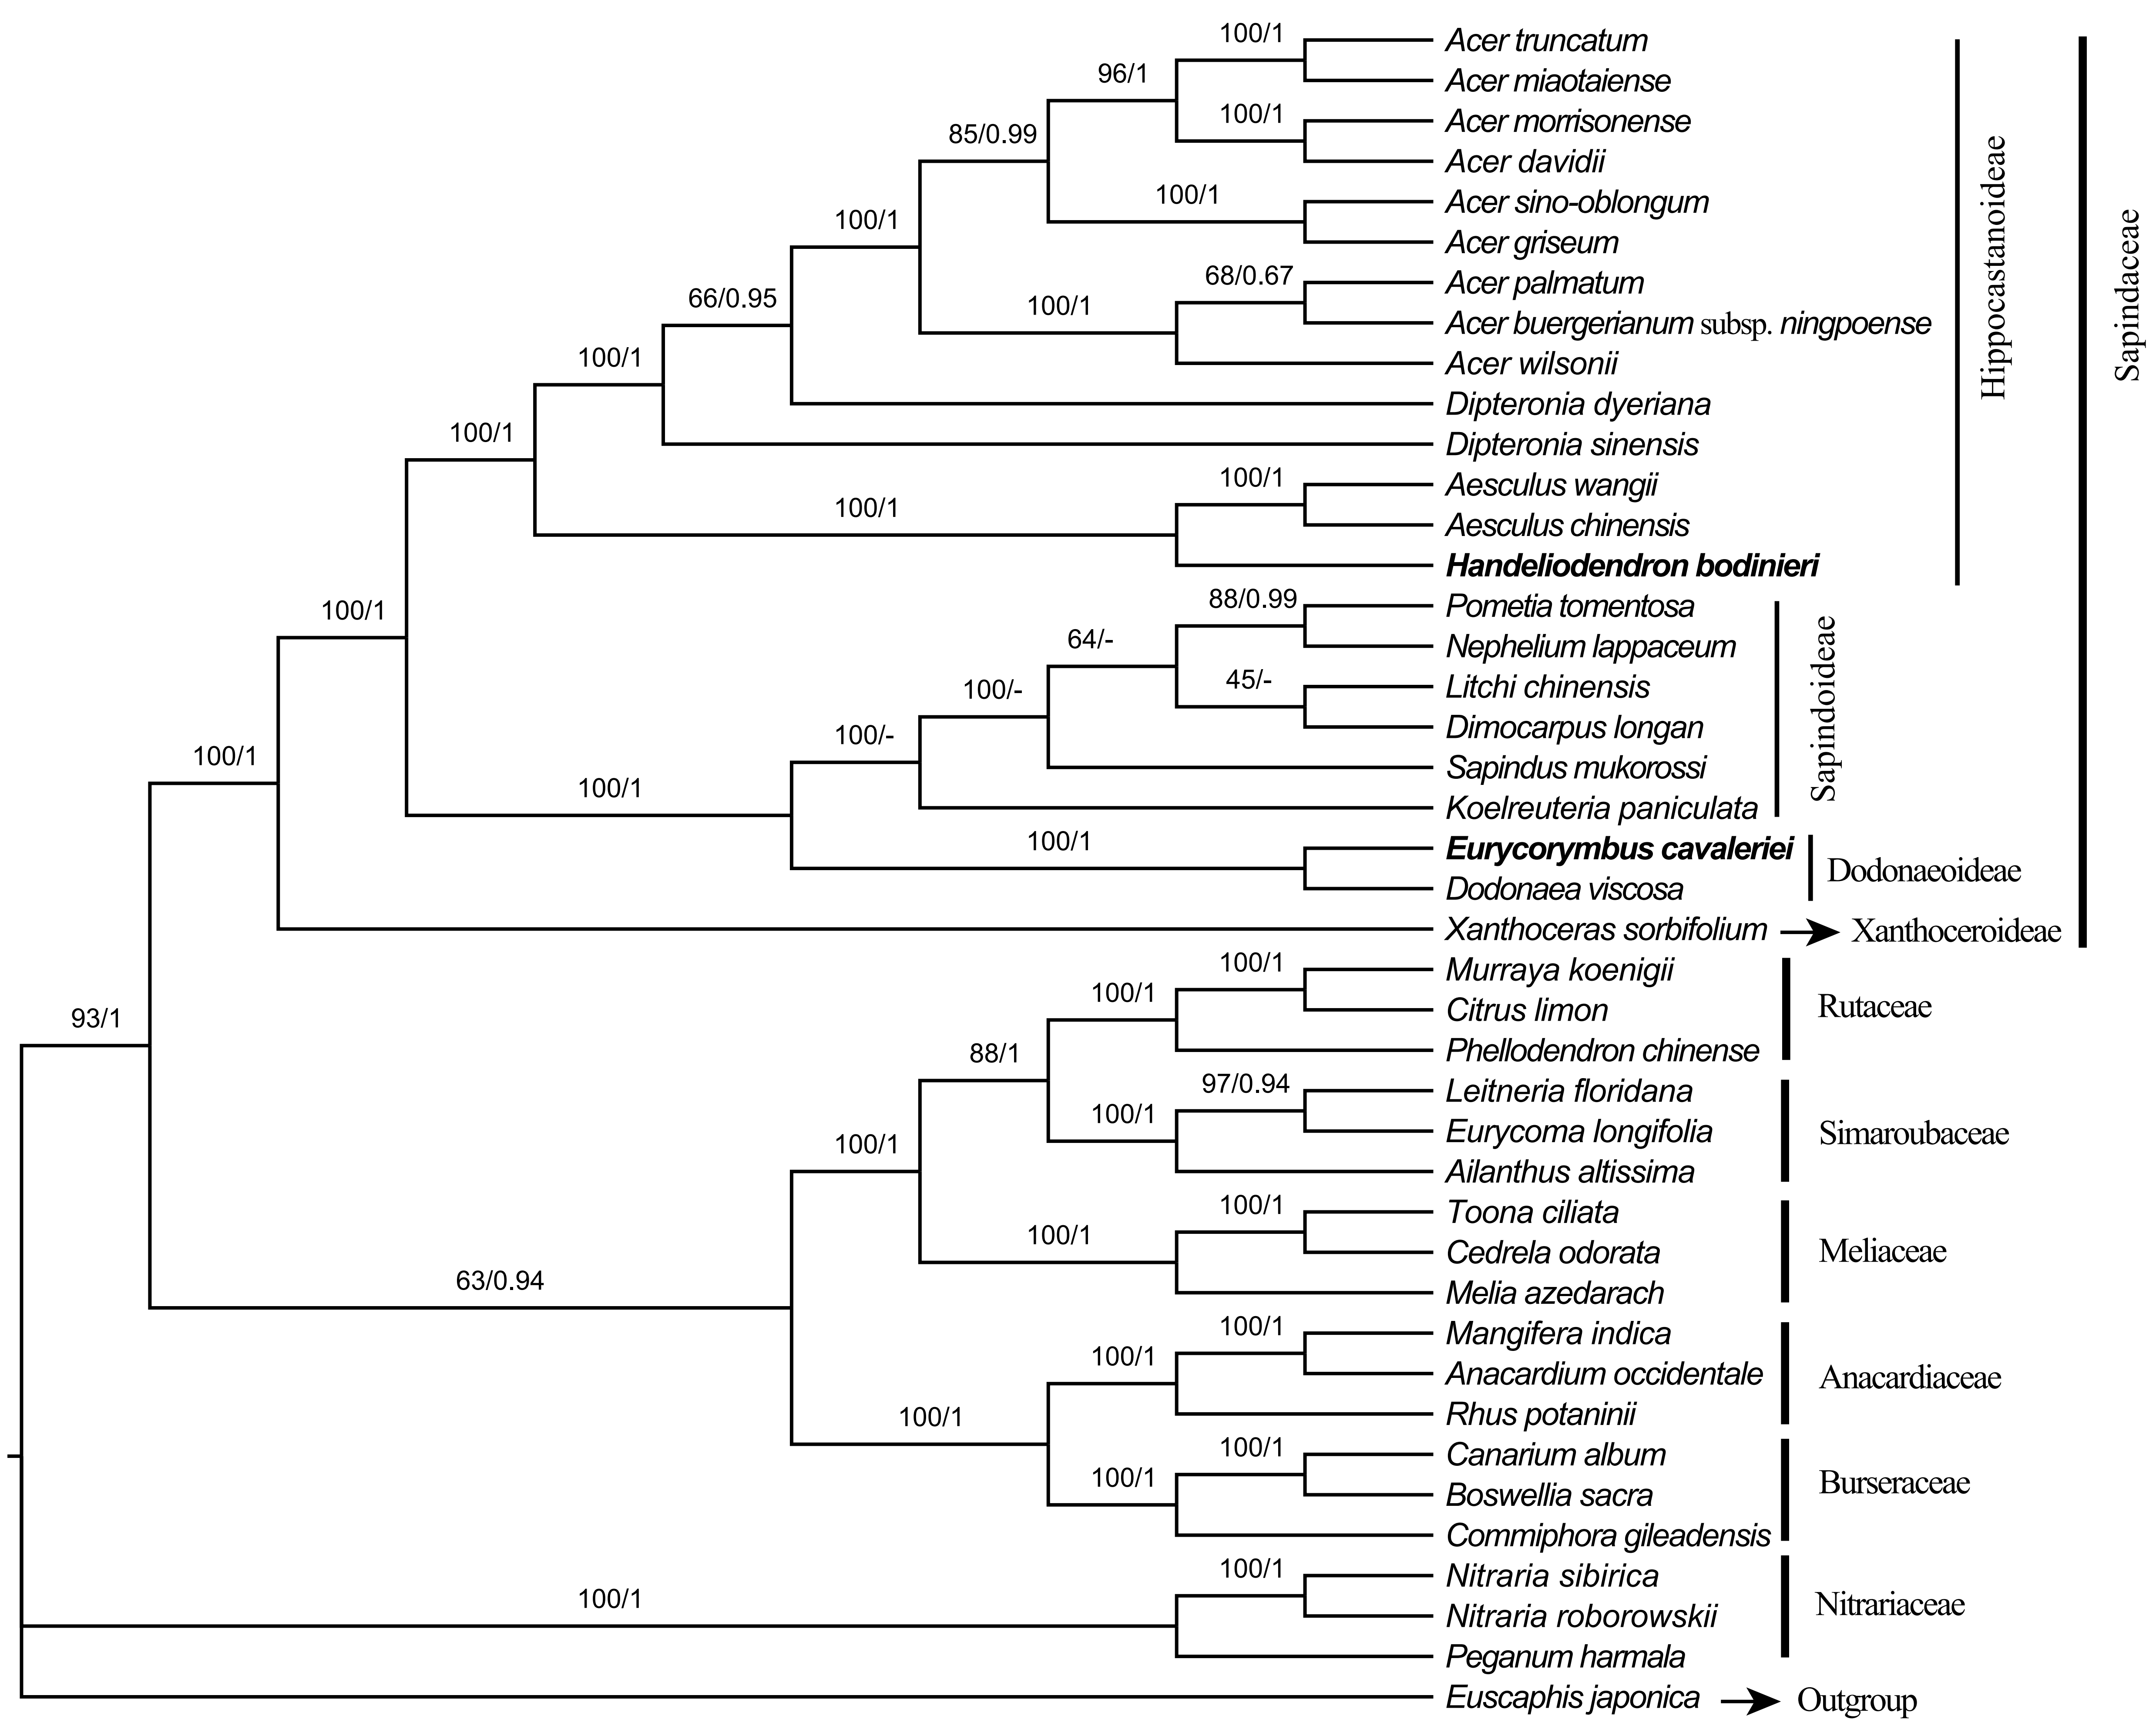

Supplement: 12864_2021_8259_MOESM9_ESM.pdf [file 12864_2021_8259_MOESM9_ESM.pdf]
